# Supplementary material for: Three-dimensional lattice deformation of blue phase liquid crystals under electrostriction
Source: Royal Society of Chemistry journal article supplement (doi:10.1039/d2sm00244b), 2022-01-01
Supplement: d2sm00244b1.pdf [file d2sm00244b1.pdf]

*Supporting Information for*

**Three-dimensional lattice deformation of blue phase  
liquid crystals under electrostriction**

Yuxian Zhang,<sup>a</sup> Hiroyuki Yoshida,<sup>b\*</sup> Fan Chu,<sup>a</sup> Yu-Qiang Guo,<sup>a</sup> Zhou Yang,<sup>c</sup> Masanori Ozaki<sup>b</sup> and Qiong-Hua Wang<sup>a\*</sup>

*a. School of Instrumentation and Optoelectronic Engineering, Beihang University, Beijing 100191, China.*

*b. Division of Electrical, Electronic and Infocommunications Engineering, Graduate School of Engineering, Osaka University, 2-1 Yamada-oka, Suita, Osaka 565-0871, Japan.*

*c. Department of Materials Science and Engineering, University of Science and Technology Beijing, Beijing 100083, China*

**Corresponding authors**

H. Yoshida: [yoshida@eei.eng.osaka-u.ac.jp](mailto:yoshida@eei.eng.osaka-u.ac.jp)

Q.-H. Wang: [qionghua@buaa.edu.cn](mailto:qionghua@buaa.edu.cn)

### *Optical texture of the intermediate “quasi-tetragonal” phase*

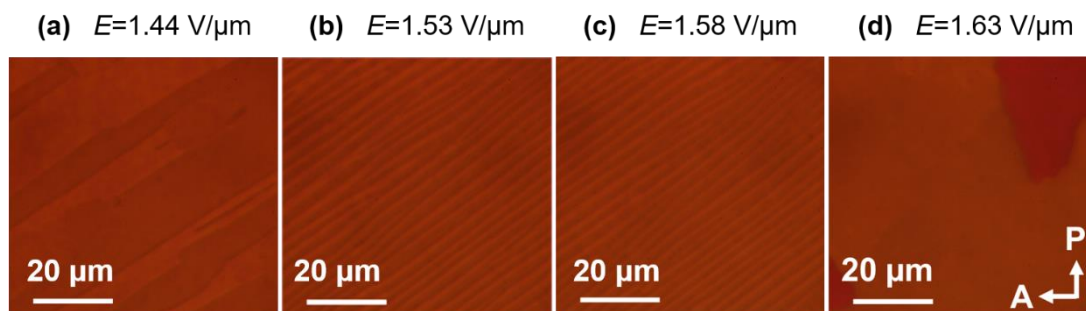

**Fig. S1** POM images of the BP I<sub>(110)</sub> twinning sample, showing the phase transitions of orthorhombic ( $E=1.44 \text{ V}/\mu\text{m}$ )→quasi-tetragonal ( $E=1.53\sim 1.58 \text{ V}/\mu\text{m}$ )→tetragonal ( $E=1.63 \text{ V}/\mu\text{m}$ ).

### *Discontinuous lattice elongation along the field*

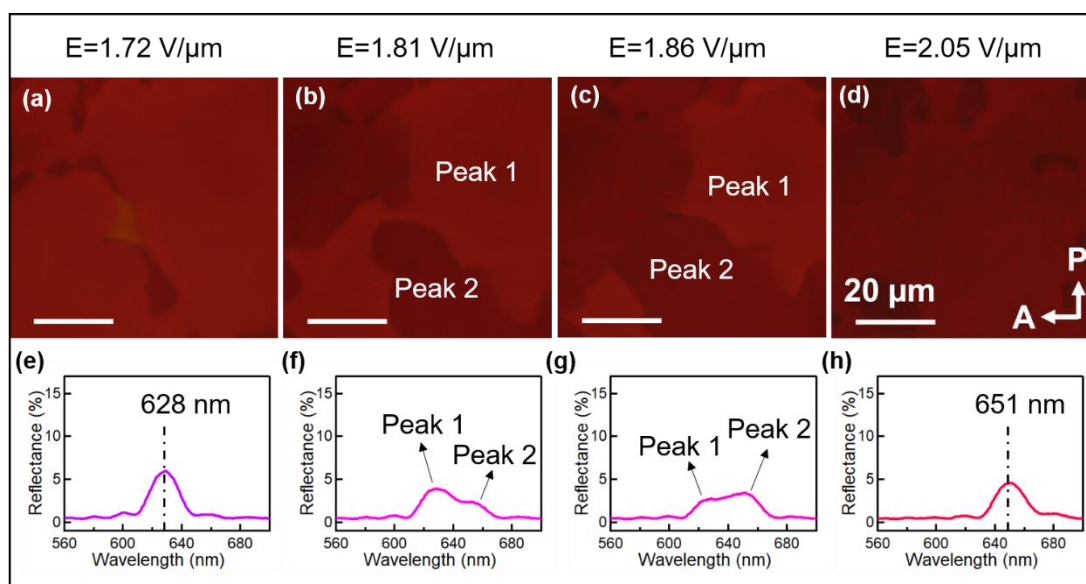

**Fig. S2** POM images and reflection spectrum of BP I crystals at varied field intensities. The gradual transition of the POM texture and the discrete redshift of reflection peaks indicate the discontinuous elongation of BP I lattice along the field direction.

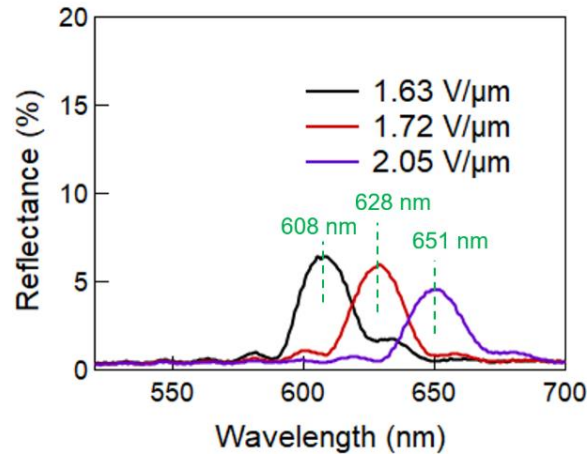

**Fig. S3** Reflection spectrum of tetragonal BP I crystals respectively at  $E=1.63$ ,  $1.72$  and  $2.05$   $\text{V}/\mu\text{m}$  (Cell thickness:  $d=5.6$   $\mu\text{m}$ ). The Bragg peak wavelength at each field intensity is obtained by fitting Gaussian function.

***Spectra of BP  $I_{(110)}$  crystals confined in a  $14.9$   $\mu\text{m}$ -thick cell***

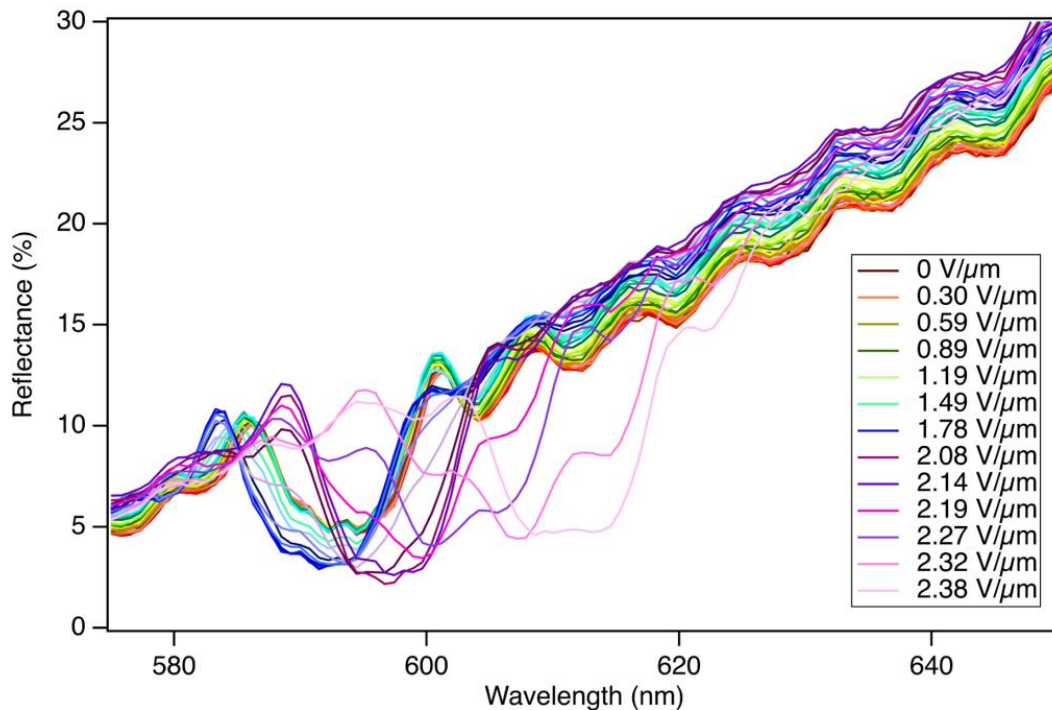

**Fig. S4** Transmission spectra of the BP  $I_{(110)}$  crystals confined in a  $14.9$   $\mu\text{m}$  cell.

*Raw Kossel pattern data under varying field intensities*

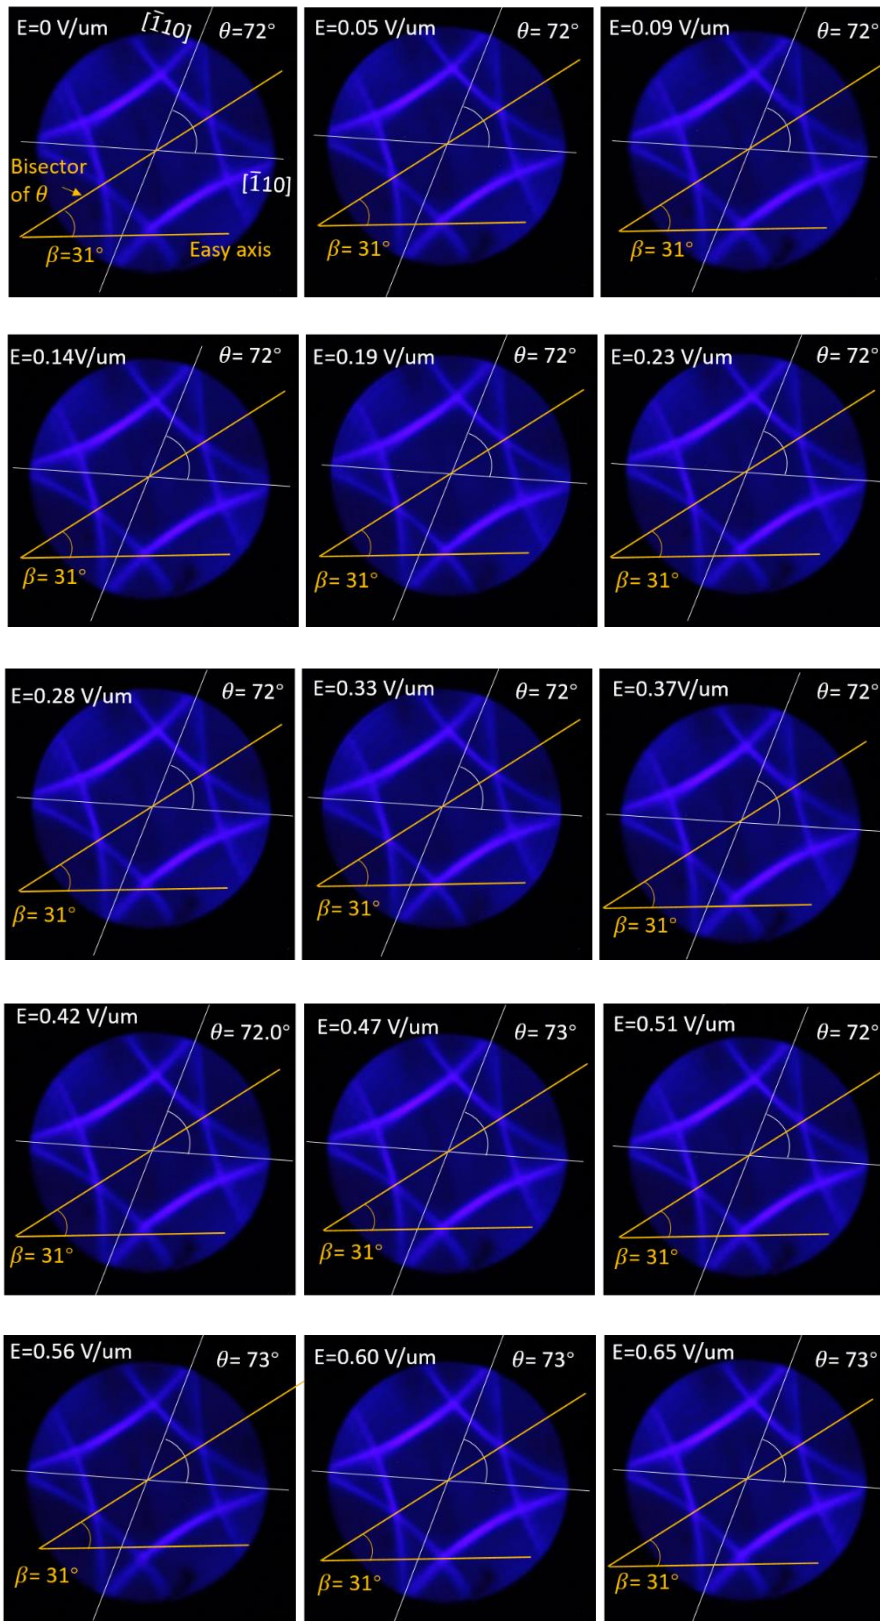

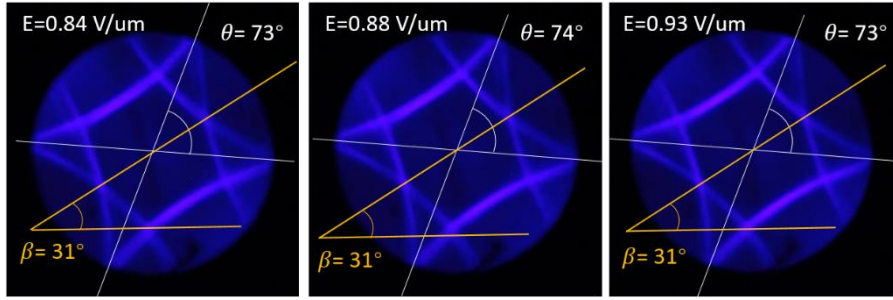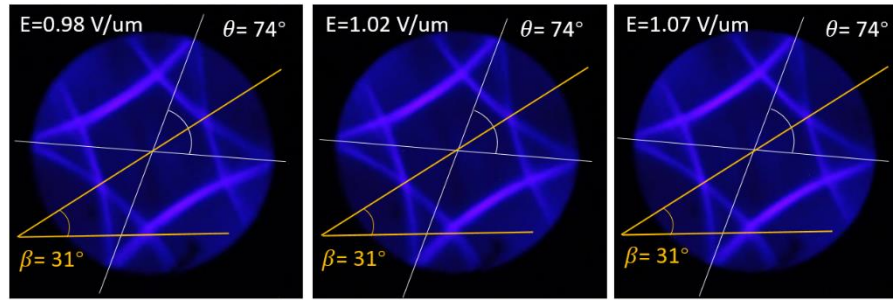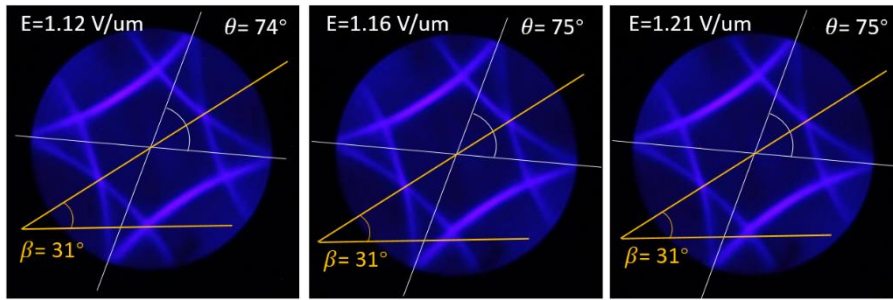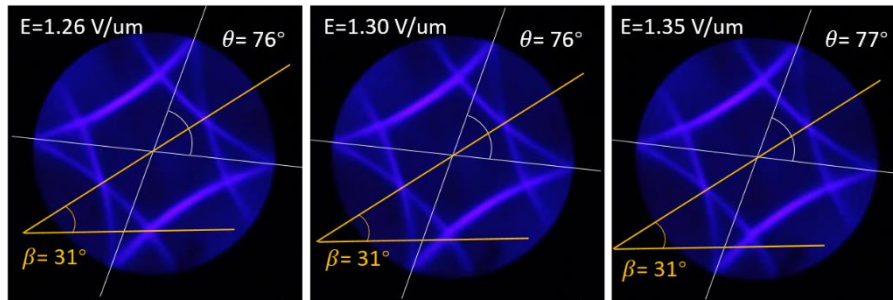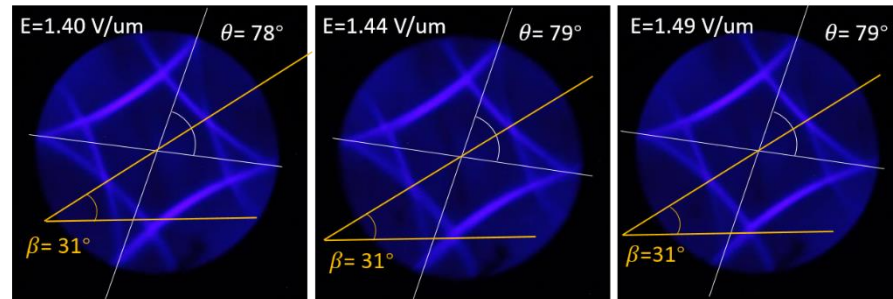

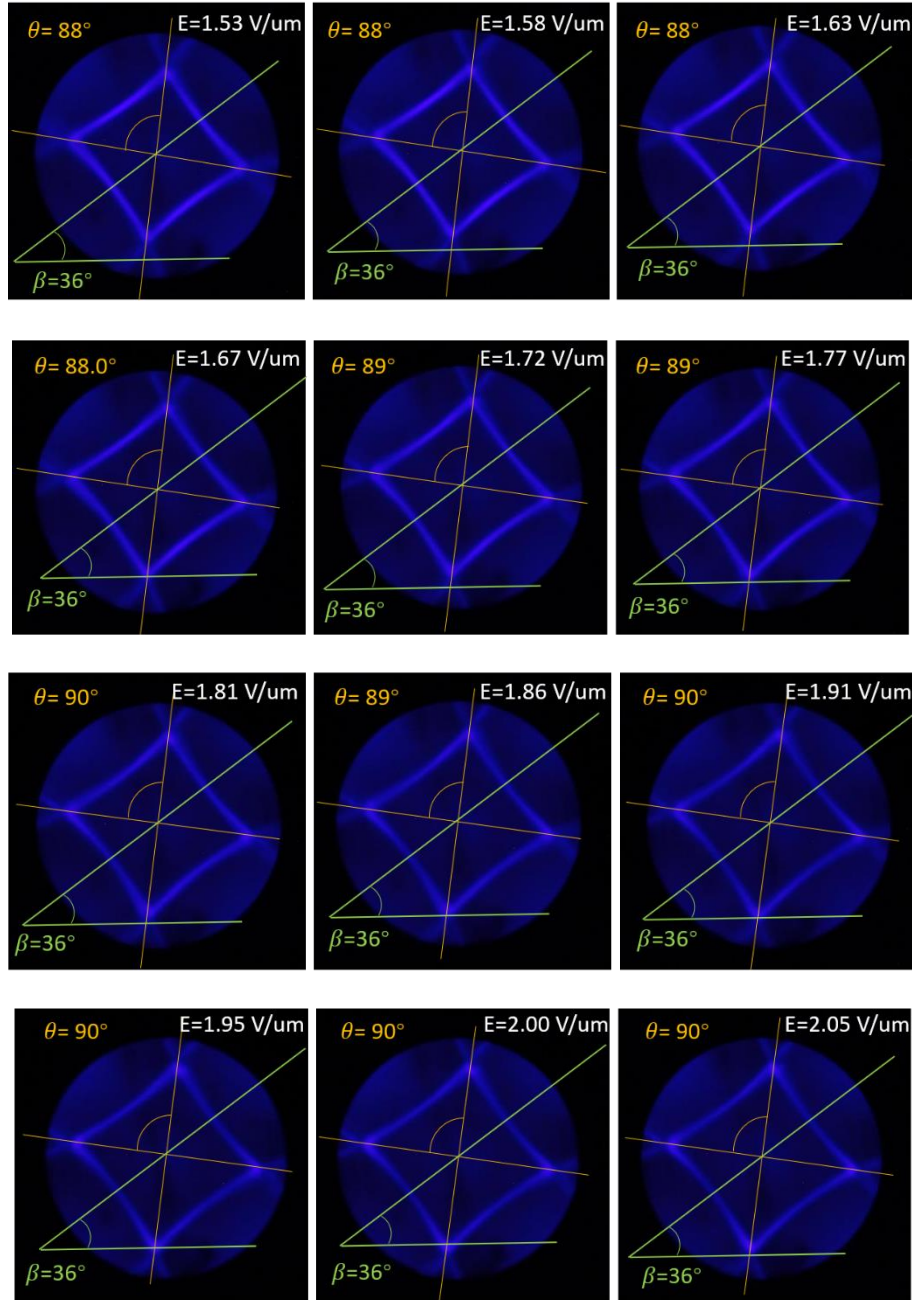

**Fig. S5** Kossel diagrams of the BP  $I_{(110)}$  twinned crystals under varied electric-field intensities, where the angle  $\beta$  indicates the lattice direction. The overlap angle  $\theta$  is measured at each diagram to calculate  $a$  and  $b$ , the lattice constants perpendicular to the field.

### ***Accuracy calculation of the lattice constant measurement***

In this work, we use Equations (2)-(4) to calculate the three-dimensional lattice constants:

$$\left\{ \begin{array}{l} c = \lambda / n \quad (2) \\ b = \sqrt{\frac{V_0}{c \tan(\theta/2)}} \quad (3) \\ a = b \tan(\theta/2) \quad (4) \end{array} \right.$$

The main error comes from the overlap angle ( $\theta$ ) measurement that affect the accuracy of  $a$  and  $b$  in the field-perpendicular direction, and the field-induced variation of refractive index ( $n$ ) of BPs that affect the accuracy of  $c$  along the field direction.

- (1) The overlap angles in Kossel diagram are measured by the screen protractor as follows in Figure S5, with the accuracy of 1' for each  $[\bar{1}10]$  axis. Considering the  $[\bar{1}10]$  axes are manually drawn, we set the error to  $\pm 0.5^\circ$  for the  $[\bar{1}10]$  axis and thus, the accuracy of measurement overlap angle  $\theta$  is within  $\pm 1^\circ$ .

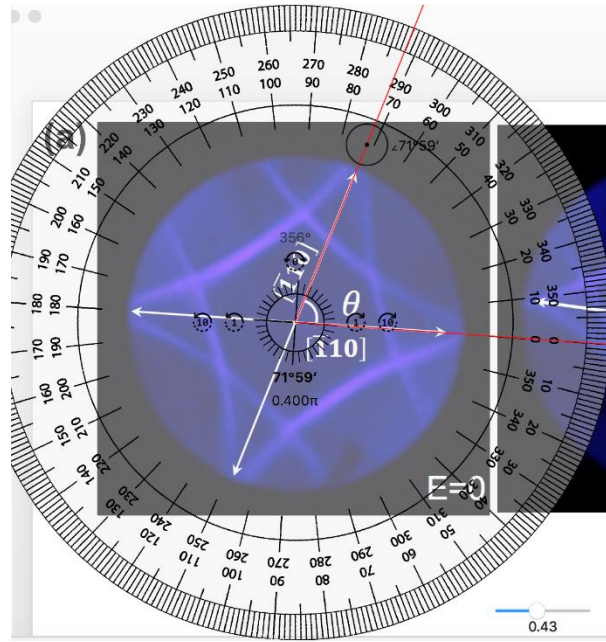

**Fig. S6** Measuring the overlap angle  $\theta$  in a Kossel diagram.

During the electrostriction,  $\theta$  is measured as  $72^\circ$  to  $90^\circ$  and  $V_E = V_0 = c_0^3 \tan(\theta_0/2)$ .

For  $\theta = 72^\circ$  at  $E=0$ , the estimated values perpendicular to the field are  $a=282$  nm,  $b=386$  nm.

If we use  $\theta = 71^\circ$ , the values turn to be  $a=275$  nm,  $b=386$  nm. ( $\Delta_{\max} = -7$  nm)

If we use  $\theta = 73^\circ$ , the values turn to be  $a=286$  nm,  $b=386$  nm. ( $\Delta_{\max} = 4$  nm)

For  $\theta=89.5^\circ$  at  $E=2.05 \text{ V}/\mu\text{m}$ , the estimated values are  $a=318 \text{ nm}$ ,  $b=321 \text{ nm}$ .

If we use  $\theta=88.5^\circ$ , the values turn to be  $a=315 \text{ nm}$ ,  $b=323 \text{ nm}$ . ( $\Delta_{\text{max}}= -3 \text{ nm}$ )

If we use  $\theta=90.5^\circ$ , the values turn to be  $a=320 \text{ nm}$ ,  $b=317 \text{ nm}$ . ( $\Delta_{\text{max}}= -4 \text{ nm}$ )

For  $\theta=79^\circ$  at  $E=1.44 \text{ V}/\mu\text{m}$ , the estimated values are  $a=301 \text{ nm}$ ,  $b=362 \text{ nm}$ .

If we use  $\theta=78^\circ$ , the values turn to be  $a=296 \text{ nm}$ ,  $b=366 \text{ nm}$ . ( $\Delta_{\text{max}} = -5 \text{ nm}$ )

If we use  $\theta=80^\circ$ , the values turn to be  $a=301 \text{ nm}$ ,  $b=359 \text{ nm}$ . ( $\Delta_{\text{max}}= 3 \text{ nm}$ )

Because  $c$  is calculated from Bragg peak wavelength, the error comes from the angle measurement is within  $\pm 7 \text{ nm}$ .

(2) For the refractive index, since the field variation is less than 0.01 and  $n=1.58$  was used in the main text, here we use  $n=1.59$  and  $n=1.57$  for  $c=\lambda/n$ :

At  $E=0$ ,  $\lambda=610 \text{ nm}$ ,  $n=1.58$  and  $c=386 \text{ nm}$ ;

if  $n=1.59$ ,  $c=384 \text{ nm}$

if  $n=1.57$ ,  $c=389 \text{ nm}$

**( $\Delta_{\text{max}}= 3 \text{ nm}$ )**

At  $E=1.72 \text{ V}/\mu\text{m}$ ,  $\lambda=628 \text{ nm}$ ,  $n=1.58$  and  $c=397 \text{ nm}$ ;

if  $n=1.59$ ,  $c=395 \text{ nm}$

if  $n=1.57$ ,  $c=400 \text{ nm}$

**( $\Delta_{\text{max}}= 3 \text{ nm}$ )**

At  $E=2.05 \text{ V}/\mu\text{m}$ ,  $\lambda=651 \text{ nm}$ ,  $n=1.58$  and  $c=412 \text{ nm}$ ;

if  $n=1.59$ ,  $c=409 \text{ nm}$

if  $n=1.57$ ,  $c=415 \text{ nm}$

**( $\Delta_{\text{max}}= 3 \text{ nm}$ )**



When we calculate  $a$  and  $b$ , we use the value of  $c$  directly, so the error caused by refractive index is within  $\pm 3$  nm.

To sum up, the accuracy for the lattice constant measurement is at least within  $\pm 10$  nm.
